# Supplementary material for: Insights into electrochemiluminescent enhancement through electrode surface modification
Source: Royal Society of Chemistry journal article supplement (doi:10.1039/c2an36045d), 2012-11-22
Supplement: c2an36045d.pdf [file c2an36045d.pdf]

## Insights into Electrochemiluminescent enhancement through electrode surface modification.

Emmet J. O'Reilly, Tia E. Keyes, Robert J. Forster\* and Lynn Dennany\*

\*Centre for Forensic Science, Department of Pure & Applied Chemistry, University of Strathclyde, Royal College, 204 George Street, Glasgow, G1 1XW, Scotland. Fax: +141 548 2532; Tel: +141 548 4322; E-mail: [lynn.dennany@strath.ac.uk](mailto:lynn.dennany@strath.ac.uk)

National Centre for Sensor Research, School of Chemical Sciences, Dublin City University, Dublin 9, Ireland. Fax: +353 1 7005503; Tel: +353 1 7005943; Email: [Robert.Forster@dcu.ie](mailto:Robert.Forster@dcu.ie)

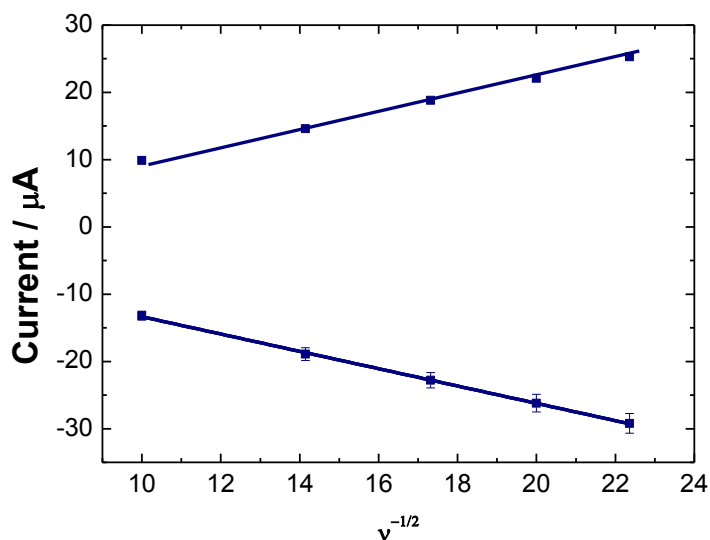

**Figure S1:** Randles-Sevcik response for a thin film of [Ru(bpy)<sub>2</sub>(PVP)<sub>10</sub>]<sup>2+</sup>. The supporting electrolyte was 0.1 M LiClO<sub>4</sub>,  $\Gamma = 7 \times 10^{-8}$  molcm<sup>-2</sup>. Analysis was performed at pH 6.0.

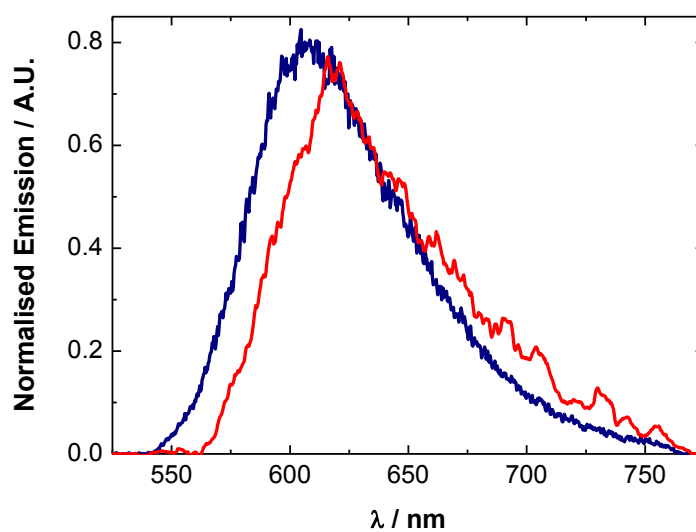

**Figure S2:** Typical photoluminescence (blue line) and ECL spectrum (red line) of a  $[\text{Ru}(\text{bpy})_2(\text{PVP})_{10}]^{2+}$  film in contact with a solution containing 0.1 M  $\text{H}_2\text{SO}_4$  and 0.5 mM  $\text{C}_2\text{O}_4^{2-}$ . An excitation wavelength of 355 nm was utilised.
